# Supplementary material for: An enantioselective desymmetrisation approach to C9-substituted trans-hydrindene rings based on a diastereotopic group-selective intramolecular Diels–Alder reaction
Source: Royal Society of Chemistry journal article supplement (doi:10.1039/b607488j), 2006-01-01
Supplement: b607488j.pdf [file b607488j.pdf]

---

## Supporting information

### **An enantioselective desymmetrisation approach to C9-substituted *trans*-hydrindene rings based on a diastereotopic group-selective intramolecular Diels-Alder reaction.**

Nadia Azzi,<sup>a</sup> Ed Griffen,<sup>b</sup> Mark Light<sup>c</sup> and Bruno Linclau<sup>\*,a</sup>

#### Contents :

A) Synthesis of 3-[(2*E*,7*E*)-6-((*E*)-buta-1,3-dienyl)-deca-2,7,9-trienoyl]-oxazolidin-2-one (**11**)

- Experimental procedure from **11**
- Characterisation data for **11**
- Copy of <sup>1</sup>H NMR and <sup>13</sup>C NMR spectrum of **11**

B) The IMDA process

- Experimental procedure for the thermal, achiral, and chiral Lewis acid catalysed IMDA process
- Characterisation data for **12**
- Copy of <sup>1</sup>H NMR and <sup>13</sup>C NMR spectrum of **12**
- Partial characterisation data for **13**
- Comparison with literature <sup>1</sup>H NMR data to establish the *trans* ring junction in the minor diastereoisomer
- Copy of <sup>1</sup>H NMR spectrum after IMDA reaction

C) Mosher ester analysis

### A) Synthesis of 3-[(2E,7E)-6-((E)-buta-1,3-dienyl)-deca-2,7,9-trienoyl]-oxazolidin-2-one (11)

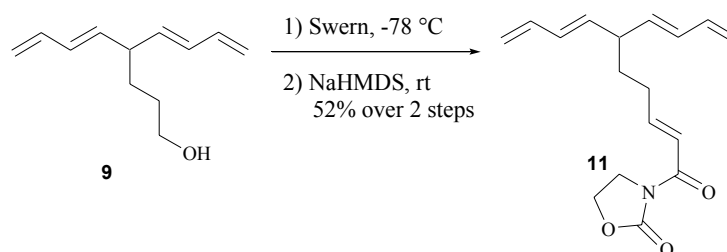

To a solution of oxalyl chloride (754  $\mu\text{L}$ , 6.8 mmol) in  $\text{CH}_2\text{Cl}_2$  (3.4 mL) at -78 °C was added DMSO (963  $\mu\text{L}$ , 13.6 mmol). After 20 min, a solution of alcohol **9** (417 mg, 2.3 mmol) in  $\text{CH}_2\text{Cl}_2$  (1 mL) was added. After 2.5 h, TEA (1.9 mL, 13.6 mmol) was added. The reaction mixture was warmed up to 0 °C. After 30 min at this temperature, the reaction mixture was concentrated *in vacuo*. The resulting residue was suspended in THF and filtered through a glass frit followed by rinsing with THF. The filtrate was concentrated *in vacuo* to afford an orange oil which was used in the next step without further purification.

To a solution of phosphonate **10** (1.4 g, 5.1 mmol) in THF (5 mL) at 0 °C was added NaHMDS (1 M in THF, 5.1 mL, 5.1 mmol). The bright yellow solution was stirred for 5 min at the same temperature and was warmed up to room temperature. A solution of crude aldehyde, as obtained above, in THF (1 mL) was added. The orange solution was stirred for 2 h. The reaction was quenched with phosphate buffer pH 7.2 (10 mL) and diluted with AcOEt (10 mL). The layers were separated and the aqueous layer was extracted with AcOEt (2  $\times$  10 mL). The combined organic layers were washed with 1 M aqueous  $\text{NaHSO}_4$  (1  $\times$  10 mL), water (1  $\times$  10 mL), saturated aqueous  $\text{NaHCO}_3$  (1  $\times$  10 mL), brine (1  $\times$  10 mL) and dried over anhydrous  $\text{MgSO}_4$ . After removing the solvent *in vacuo*, the residue was purified by column chromatography (hexane/AcOEt 2:1) to afford **11** as a yellow oil (347 mg, 52% from **9**).

IR (film):  $\nu_{\text{max}}$  2923 (w), 1773 (s), 1681 (m), 1633 (m), 1603 (w), 1360 (s), 1219 (s), 1004 (s)  $\text{cm}^{-1}$ ;

$^1\text{H}$  NMR (300 MHz;  $\text{CDCl}_3$ ):  $\delta_{\text{H}}$  7.24 (1 H, d,  $J$  15.5,  $\text{CH}=\text{CH}-\text{C}=\text{O}$ ), 7.12 (1 H, dt,  $J$  15.5 and 6.4,  $\text{CH}=\text{CH}-\text{C}=\text{O}$ ), 6.31 (2 H, dt,  $J$  16.9 and 10.2,  $2 \times \text{CH}_2=\text{CH}$ ), 6.05 (2 H,

dd,  $J$  15.3 and 10.3,  $2 \times \text{CH}_2=\text{CH}-\text{CH}$ ), 5.57 (2 H, dd,  $J$  15.3 and 7.7,  $2 \times \text{CH}_2=\text{CH}-\text{CH}=\text{CH}$ ), 5.14 (2 H, dd,  $J$  17.0 and 1.7,  $2 \times \text{CH}=\text{CH}_{\text{cis}}\text{H}_{\text{trans}}$ ), 5.01 (2 H, dd,  $J$  10.2 and 1.7,  $2 \times \text{CH}=\text{CH}_{\text{cis}}\text{H}_{\text{trans}}$ ), 4.42 (2 H, t,  $J$  8.0,  $\text{CH}_2-\text{N}$ ), 4.06 (2 H, t,  $J$  8.1,  $\text{CH}_2-\text{O}$ ), 2.81 (1 H, quint,  $J$  7.4,  $\text{CH}-\text{CH}_2-\text{CH}_2$ ), 2.28 (2 H, q,  $J$  7.3,  $\text{CH}_2-\text{CH}=\text{CH}$ ) and 1.62 (2 H, q,  $J$  7.5,  $\text{CH}-\text{CH}_2-\text{CH}_2$ ) ppm;

$^{13}\text{C}$  NMR (75 MHz;  $\text{CDCl}_3$ ):  $\delta_{\text{C}}$  165.2 (1  $\times$  s), 153.4 (1  $\times$  s), 150.9 (1  $\times$  d), 136.8 (2  $\times$  d), 136.1 (2  $\times$  d), 131.3 (2  $\times$  d), 120.2 (1  $\times$  d), 116.1 (2  $\times$  t), 62.0 (1  $\times$  t), 45.0 (1  $\times$  d), 42.6 (1  $\times$  t), 32.9 (1  $\times$  t), 30.3 (1  $\times$  t) ppm;

MS (CI)  $m/z$  288 (( $\text{M}+\text{H}$ ) $^+$ , 26%), 201 (30), 172 (18), 146 (92), 91 (100);

HRMS (ES) for  $\text{C}_{17}\text{H}_{21}\text{NO}_3\text{Na}$  ( $\text{M}+\text{Na}$ ) $^+$  calcd 310.1413 found 310.1417.

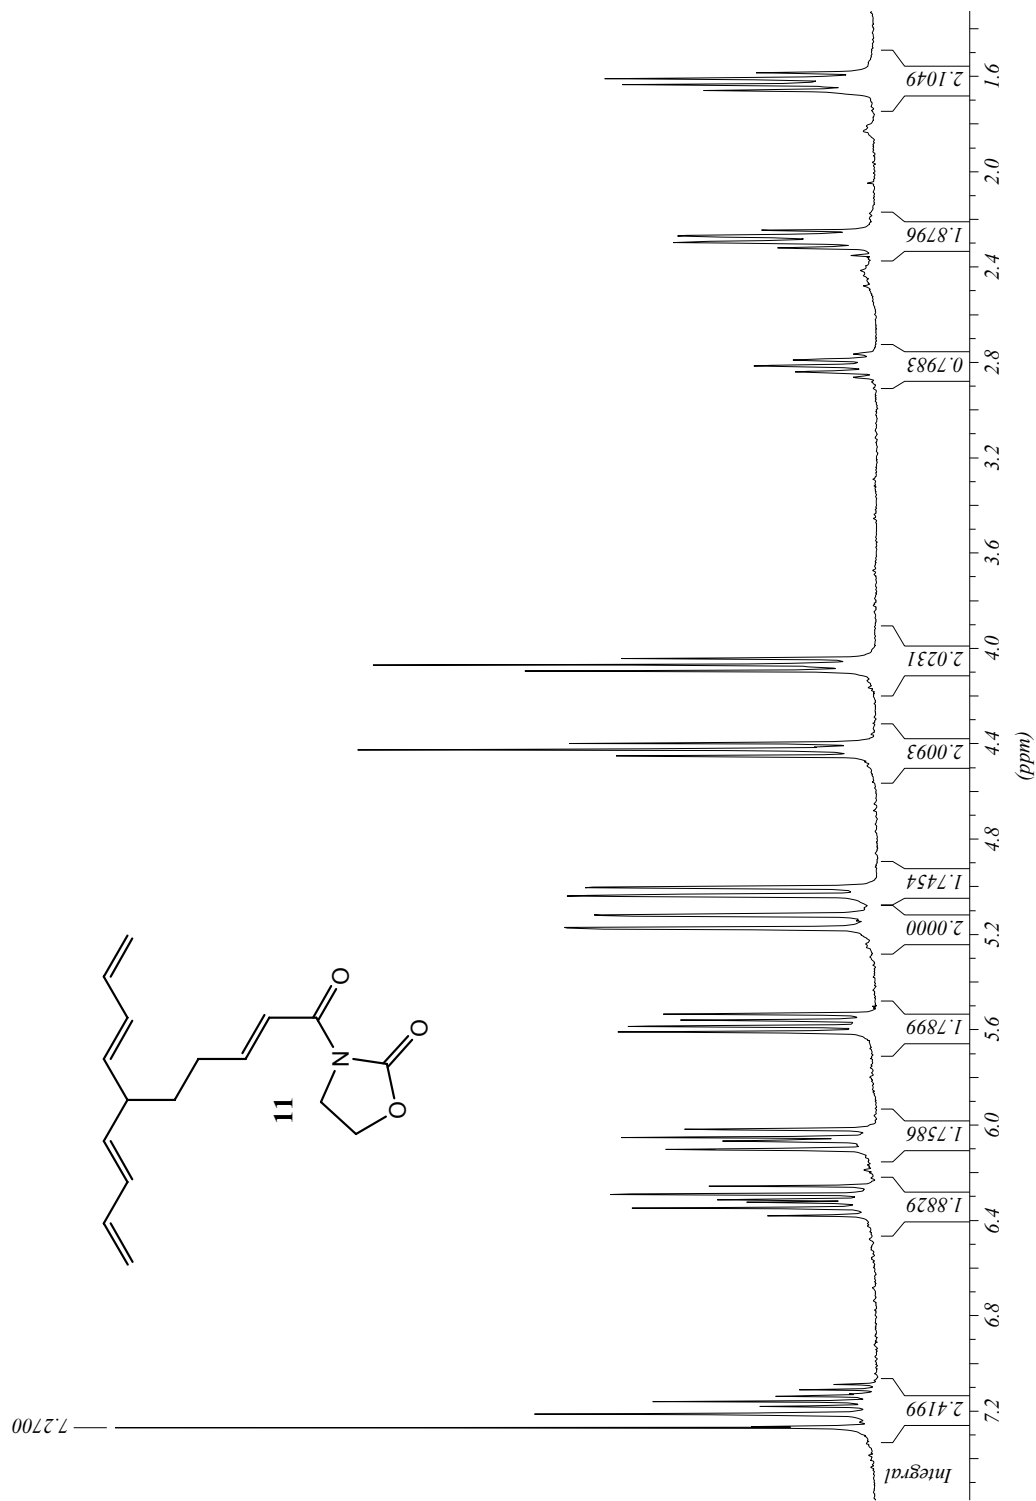

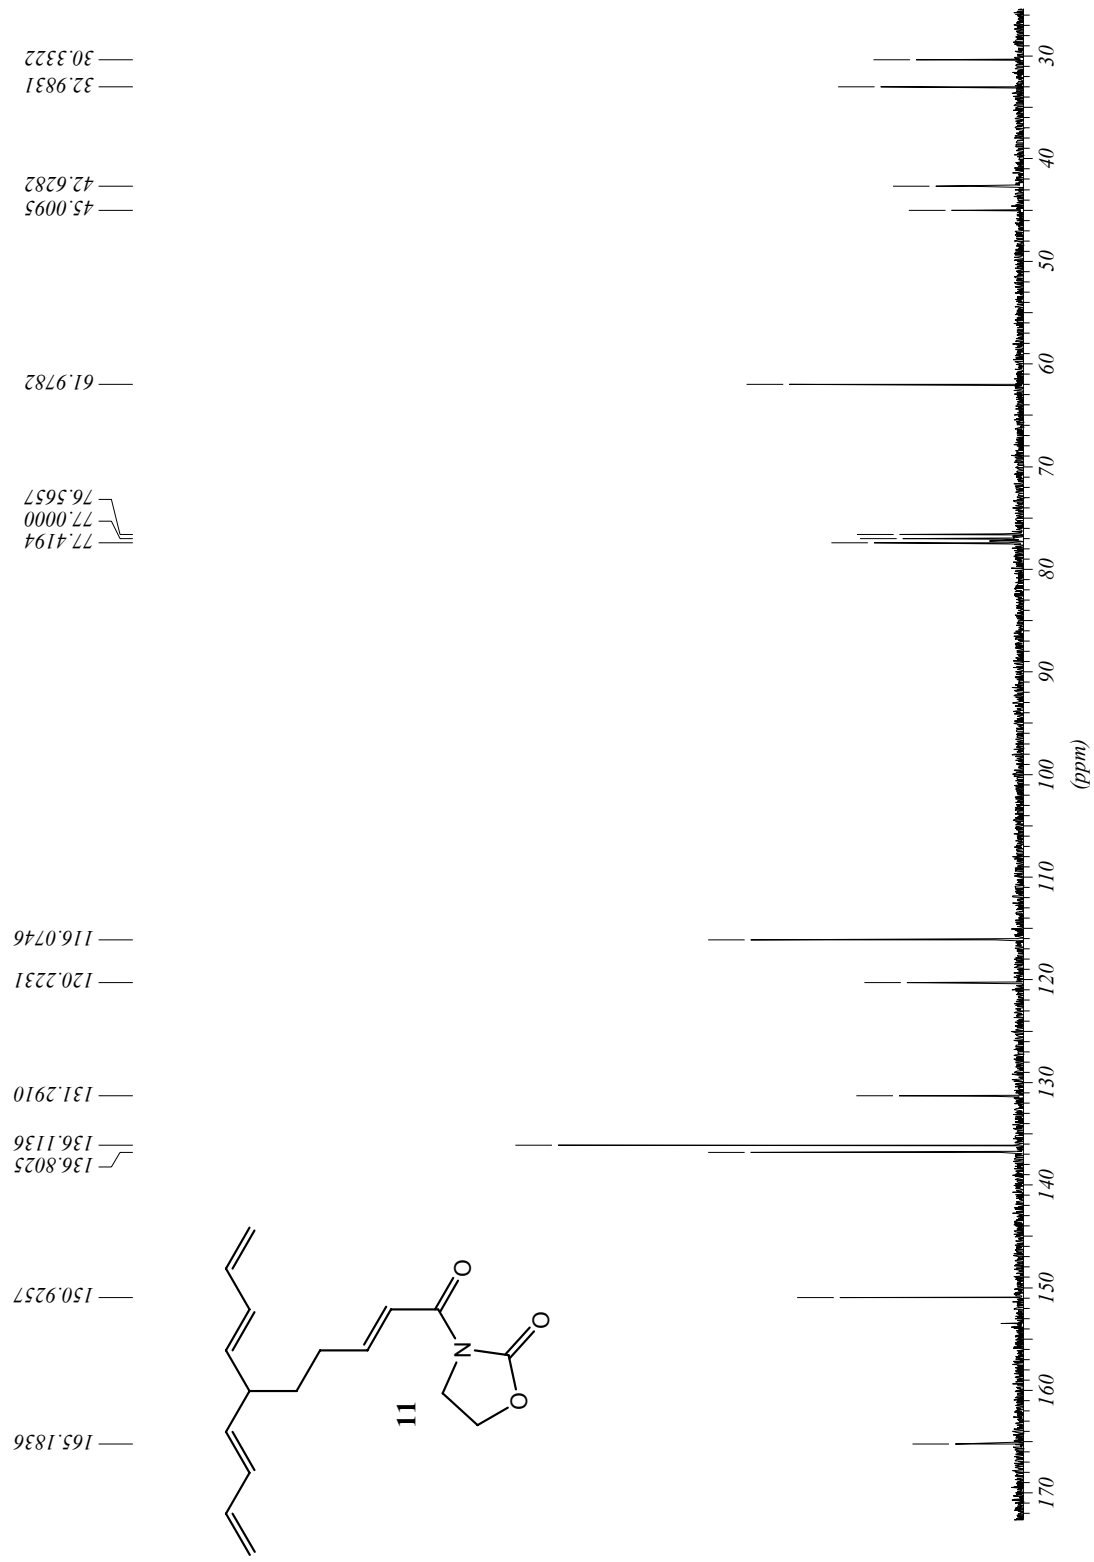

## B) The IMDA process

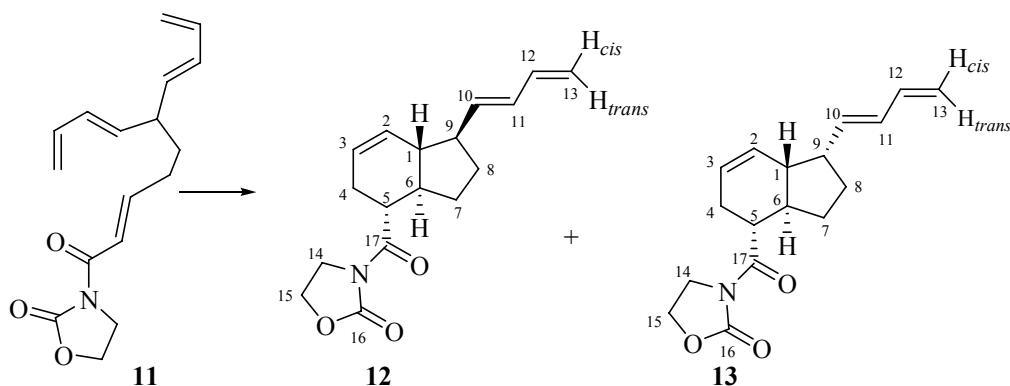

### Under thermal conditions:

To a solution of **11** (284 mg, 0.99 mmol) in anhydrous toluene (20 mL) in a sealed tube was added BHT (2 mg, 0.01 mmol). The solution was degassed with a nitrogen stream. The reaction was heated at 150 °C for 24 h. The solvent was removed and the residue was purified by column chromatography (neat CH<sub>2</sub>Cl<sub>2</sub>) to afford the product as a white solid (227 mg, 80%) in a 70:30 ratio of **12/13**.

### Under achiral Lewis-acid catalysed conditions:

To a solution of **11** (40 mg, 0.14 mmol) in anhydrous CH<sub>2</sub>Cl<sub>2</sub> (4.6 mL) at -78 °C was added Me<sub>3</sub>Al (2 M in hexane, 100 μL, 0.20 mmol). The bright yellow solution was immediately warmed up to -30 °C. After 4 h at this temperature, the reaction was diluted with Et<sub>2</sub>O (5 mL) and quenched with saturated aqueous solution of Rochelle's salt (5 mL). After the phase separation, the aqueous phase was extracted with Et<sub>2</sub>O (2 × 5 mL). The combined organic phases were washed with brine (1 × 5 mL) and dried over anhydrous MgSO<sub>4</sub>. After removing the solvent *in vacuo*, the residue was purified by column chromatography (CH<sub>2</sub>Cl<sub>2</sub>/MeOH 99.5:0.5) to afford **12/13** as a white solid (24 mg, 59%) as a 78:22 ratio of **12/13**.

### With the chiral bis(oxazoline) catalyst:

To a solution of **11** (60 mg, 0.21 mmol) in anhydrous CH<sub>2</sub>Cl<sub>2</sub> (5.2 mL) was added a solution of [Cu(S,S)-bis(tert-butyloxazoline)](SbF<sub>6</sub>)<sub>2</sub> (0.014 M in CH<sub>2</sub>Cl<sub>2</sub>, 1.5 mL, 0.02 mmol). The reaction was stirred at room temperature for 24 h. The solvent

was removed and the residue was purified by column chromatography (neat CH<sub>2</sub>Cl<sub>2</sub>) to afford **2** as a white solid (34 mg, 56%) in a 82:18 ratio of **12/13**.

The diastereoisomers were separated by reverse phase HPLC (X-Terra Prep RP<sub>18</sub> column 5 μm 19×100 mm, mobile phase 50-55% 1% aqueous NH<sub>3</sub> in CH<sub>3</sub>CN and the detection was performed at 230 nm).

**Data for the major isomer 12:**

mp 94 °C;

IR (film):  $\nu_{\max}$  2961 (w), 2911 (w), 2864 (w), 1784 (s), 1688 (s), 1650 (w), 1604 (w), 1385 (s), 1200 (s) cm<sup>-1</sup>;

<sup>1</sup>H NMR (400 MHz; C<sub>6</sub>D<sub>6</sub>):  $\delta_{\text{H}}$  6.33 (1 H, dt, *J* 17.1 and 10.0, H<sub>12</sub>), 6.02 (1 H, dd, *J* 15.0 and 11.0, H<sub>11</sub>), 5.84 (1 H, d, *J* 9.5 and 2.0, H<sub>2</sub>), 5.55 (1 H, m, H<sub>3</sub>), 5.41 (1 H, dd, *J* 15.0 and 8.5, H<sub>10</sub>), 5.07 (1 H, dd, *J* 17.0 and 2.0, H<sub>13trans</sub>), 4.95 (1 H, dd, *J* 10.0 and 2.0, H<sub>13cis</sub>), 4.20 (1 H, td, *J* 10.6 and 6.0, H<sub>5</sub>), 3.08-2.97 (4 H, m, H<sub>14</sub>, H<sub>15</sub>), 2.62 (1 H, m, H<sub>4</sub>), 2.34 (1 H, m, H<sub>4</sub>), 2.09-1.97 (2 H, m, H<sub>9</sub>, H<sub>6</sub>), 1.93 (1 H, m, H<sub>8</sub>), 1.82 (2 H, m, H<sub>1</sub>), 1.74 (1 H, m, H<sub>7</sub>), 1.39-1.24 (2 H, m, H<sub>7</sub>, H<sub>8</sub>) ppm;

<sup>13</sup>C NMR (100 MHz; C<sub>6</sub>D<sub>6</sub>):  $\delta_{\text{C}}$  175.9 (1 × s, C<sub>17</sub>), 154.2 (1 × s, C<sub>16</sub>), 139.0 (1 × d, C<sub>10</sub>), 138.2 (1 × d, C<sub>12</sub>), 132.0 (1 × d, C<sub>11</sub>), 128.9 (1 × d, C<sub>2</sub>), 126.9 (1 × d, C<sub>3</sub>), 115.7 (1 × t, C<sub>13</sub>), 61.7 (1 × t, C<sub>15</sub>), 49.7 (1 × d, C<sub>6</sub>), 47.2 (1 × d, C<sub>9</sub>), 46.4 (1 × d, C<sub>1</sub>), 44.2 (1 × d, C<sub>5</sub>), 42.9 (1 × t, C<sub>14</sub>), 31.2 (1 × t, C<sub>4</sub>), 30.9 (1 × t, C<sub>7</sub>), 27.8 (1 × t, C<sub>8</sub>) ppm;

ES (CI) *m/z* 288 ((M+H)<sup>+</sup>, 82), 201 (22), 173 (8), 91 (100);

HRMS (EI) for C<sub>17</sub>H<sub>21</sub>NO<sub>3</sub> (M)<sup>+</sup> calcd 287.1521 found 287.1525.

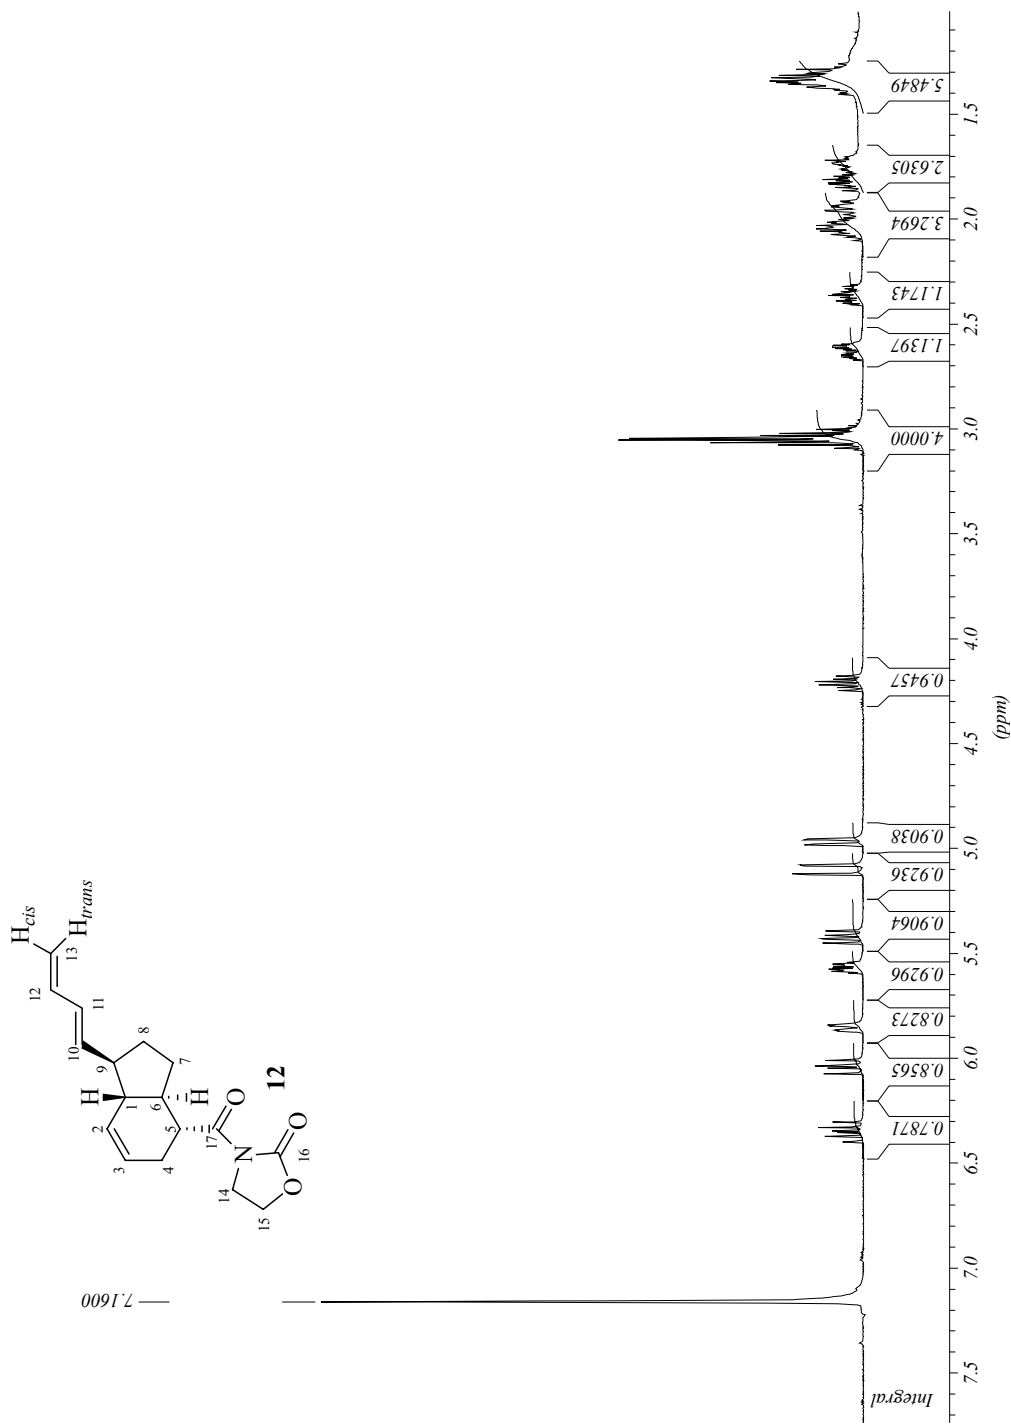



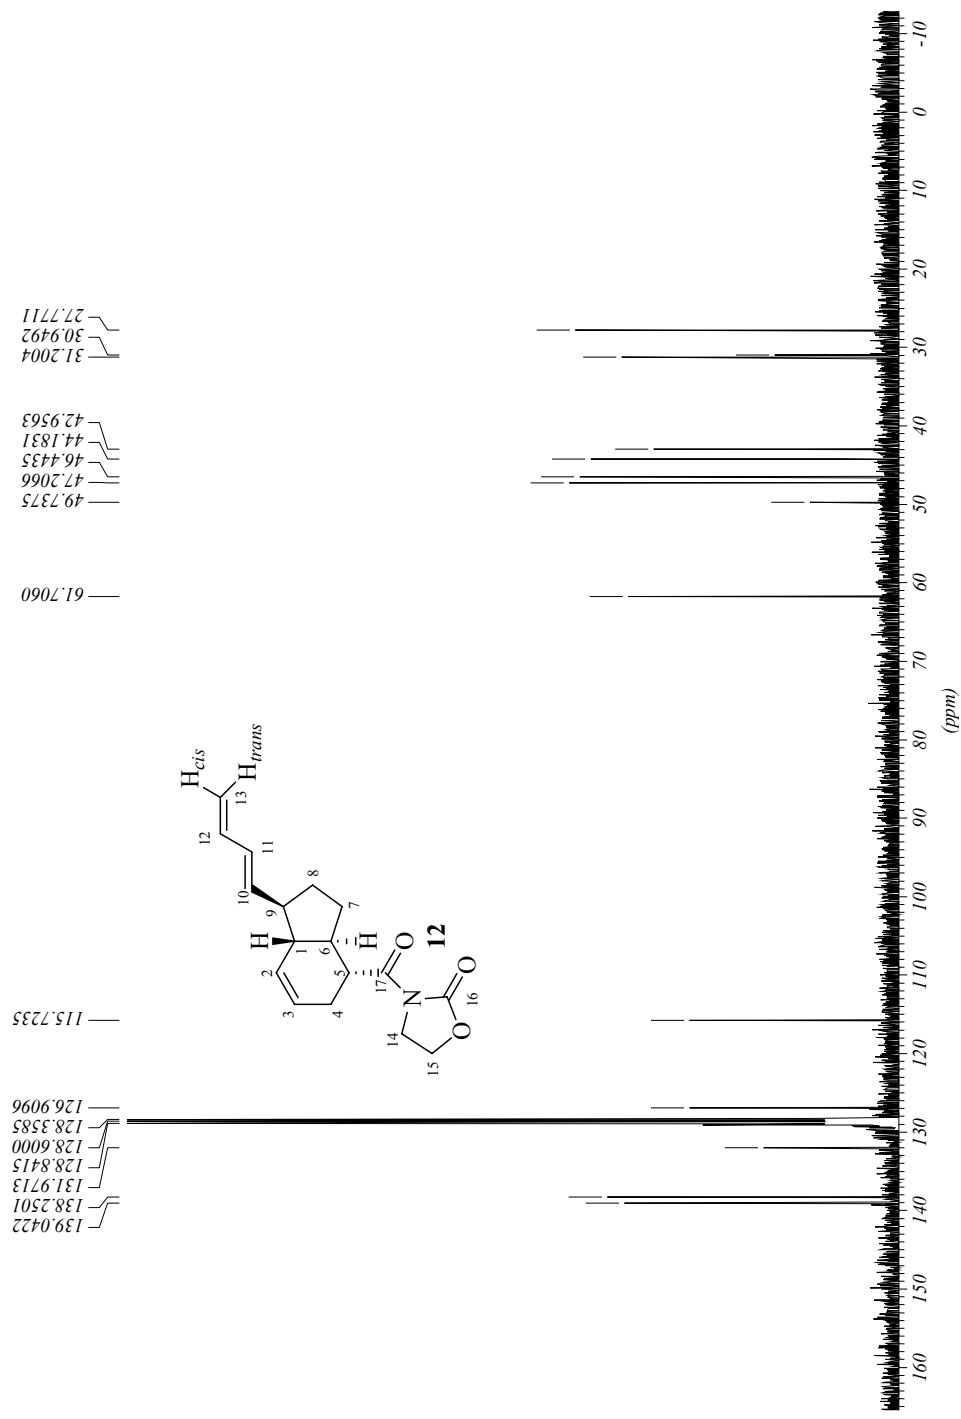

**Partial data for the minor isomer 13:**

IR (film):  $\nu_{\max}$  2961 (w), 2911 (w), 2864 (w), 1784 (s), 1688 (s), 1650 (w), 1604 (w), 1385 (s), 1200 (s)  $\text{cm}^{-1}$ ;

$^1\text{H}$  NMR (400 MHz;  $\text{C}_6\text{D}_6$ ):  $\delta_{\text{H}}$  6.36 (1 H, dt,  $J$  17.1 and 10.2,  $\text{H}_{12}$ ), 6.08 (1 H, dd,  $J$  15.0 and 10.0,  $\text{H}_{11}$ ), 5.87 (1 H, d,  $J$  9.5,  $\text{H}_2$ ); 5.17 (1 H, d,  $J$  16.6,  $\text{H}_{13\text{trans}}$ ), 5.01 (1 H, d,  $J$  10.5 and 1.5,  $\text{H}_{13\text{cis}}$ ) and 4.27 (1 H, td,  $J$  9.5 and 6.5,  $\text{H}_5$ ) ppm;

$^{13}\text{C}$  NMR (100 MHz;  $\text{C}_6\text{D}_6$ ):  $\delta_{\text{C}}$  175.9 (1  $\times$  s,  $\text{C}_{17}$ ), 154.2 (1  $\times$  s,  $\text{C}_{16}$ ), 138.8 (1  $\times$  d,  $\text{C}_{10}$ ), 138.2 (1  $\times$  d,  $\text{C}_{12}$ ), 129.3 (1  $\times$  d,  $\text{C}_{11}$ ), 128.9 (1  $\times$  d,  $\text{C}_2$ ), 126.9 (1  $\times$  d,  $\text{C}_3$ ), 115.7 (1  $\times$  t,  $\text{C}_{13}$ ), 61.7 (1  $\times$  t,  $\text{C}_{15}$ ); 48.1 (1  $\times$  d,  $\text{C}_6$ ), 44.4 (1  $\times$  d,  $\text{C}_9$ ), 43.9 (1  $\times$  d,  $\text{C}_1$ ), 43.2 (1  $\times$  d,  $\text{C}_5$ ), 42.9 (1  $\times$  t,  $\text{C}_{14}$ ), 31.3 (1  $\times$  t,  $\text{C}_7$ ); 31.2 (1  $\times$  t,  $\text{C}_4$ ) and 28.6 (1  $\times$  t,  $\text{C}_8$ ) ppm;

MS (CI)  $m/z$  288 ( $(\text{M}+\text{H})^+$ , 82%), 201 (22), 173 (8), 91 (100);

HRMS (EI) for  $\text{C}_{17}\text{H}_{21}\text{NO}_3$  ( $\text{M}$ ) $^+$  calcd 287.1521 found 287.1525.

**Comparison with literature  $^1\text{H}$  NMR data to establish the *trans* ring junction in the minor diastereoisomer**

| entry | cycloadduct | $^1\text{H}$ NMR of $\text{H}_5$ in $\text{CDCl}_3$ |                                                                                       |
|-------|-------------|-----------------------------------------------------|---------------------------------------------------------------------------------------|
| 1     | <b>12</b>   | $\delta$ 3.92, td, $J = 10.2, 6.0$ Hz               | 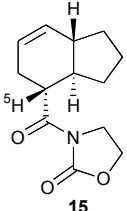 |
| 2     | <b>13</b>   | $\delta$ 3.91, td, $J = 10.6, 6.2$ Hz               |                                                                                       |
| 3     | <b>15</b>   | $\delta$ 3.91, td, $J = 10.8, 6.2$ Hz <sup>a</sup>  |                                                                                       |

<sup>a</sup> D. A. Evans, D. M. Barnes, J. S. Johnson, T. Lectka, P. von Matt, S. J. Miller, J. A. Murry, R. D. Norcross, E. A. Shaughnessy, and K. R. Campos, *J. Am. Chem. Soc.*, 1999, **121**, 7582

Mixture after IMDA reaction

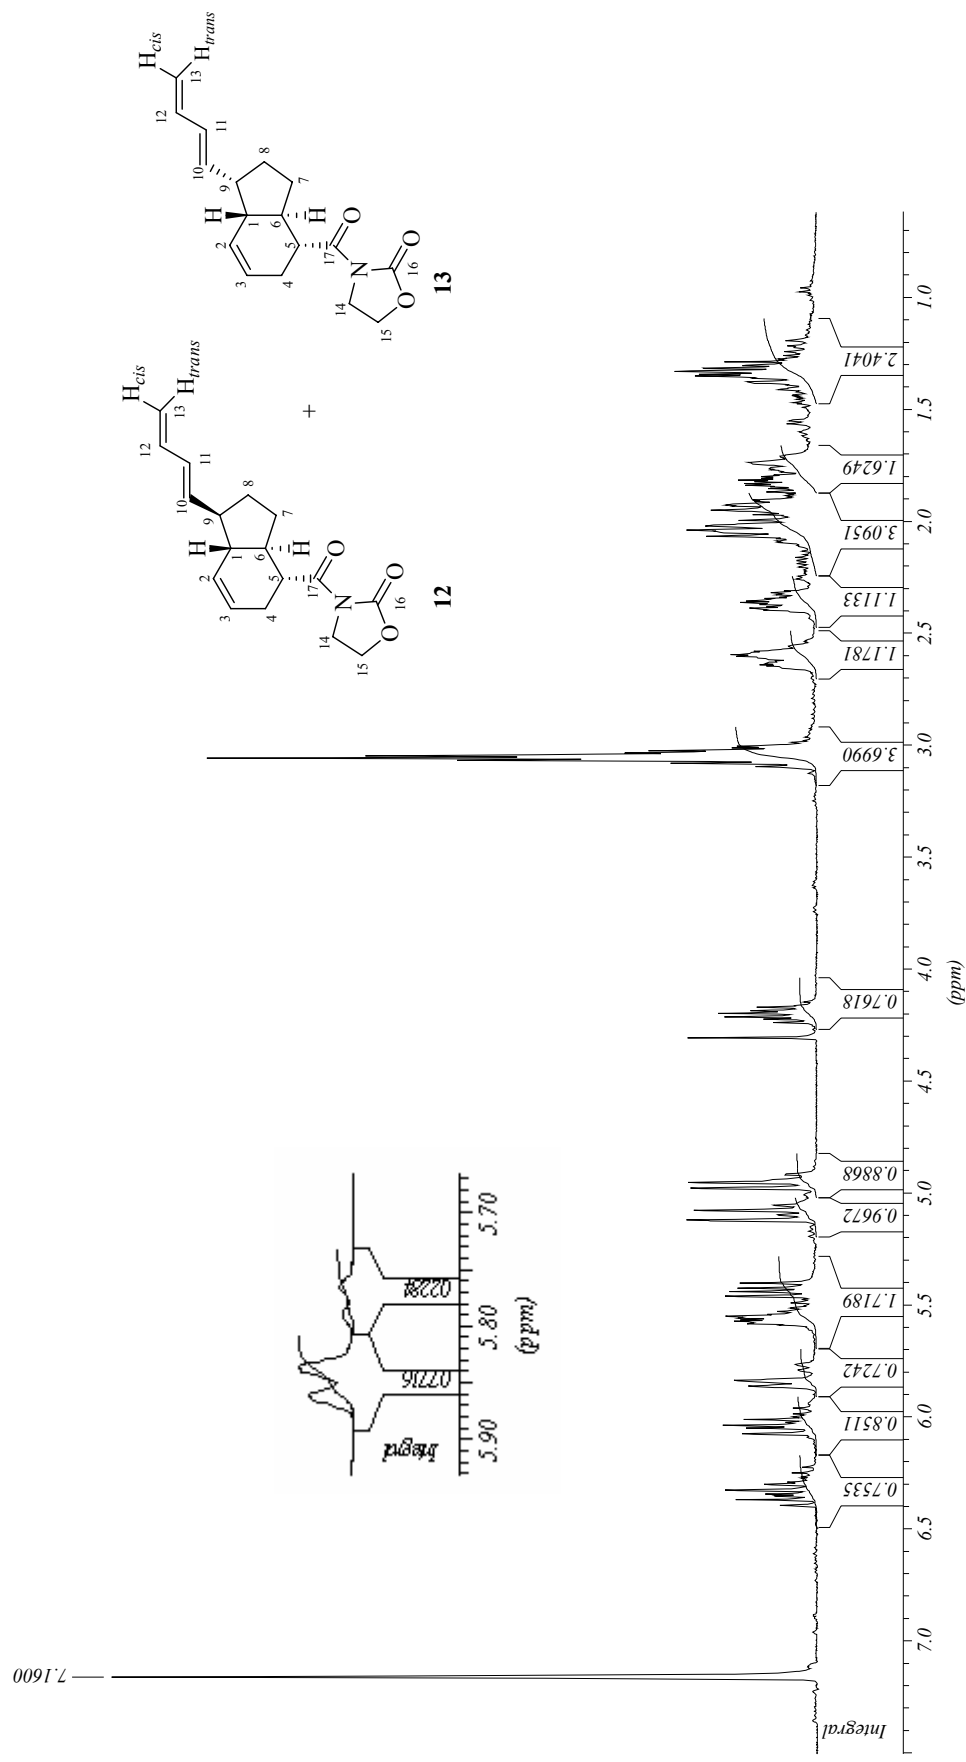

### C) Mosher's ester analysis

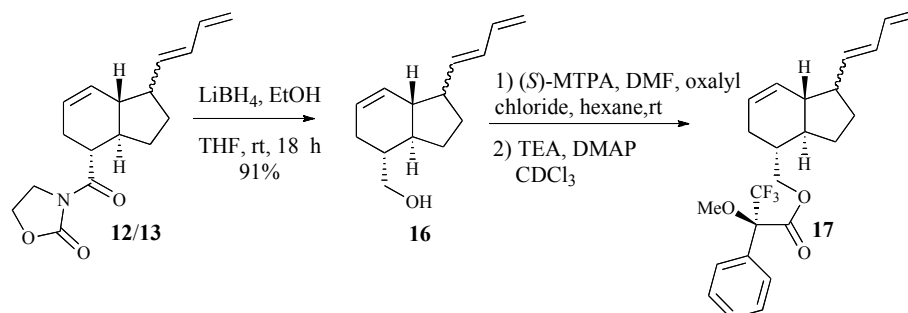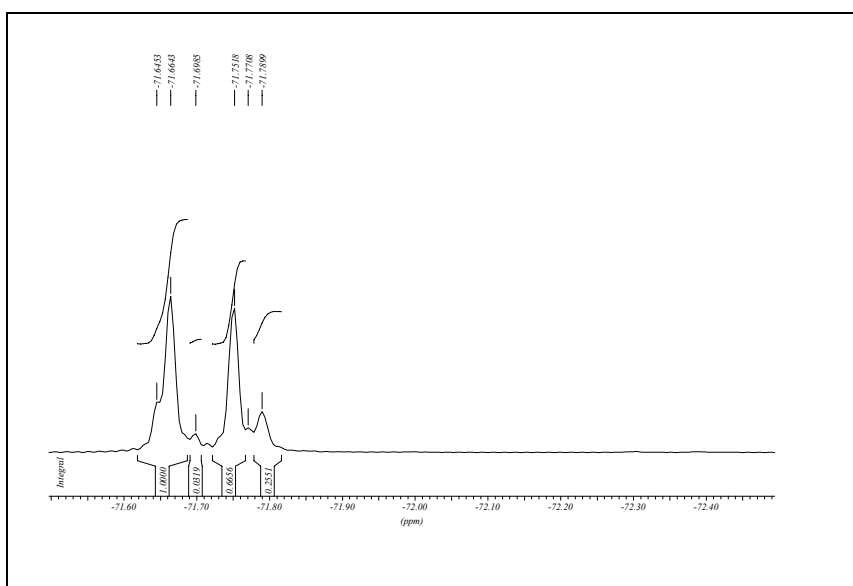

### Racemic Mosher ester

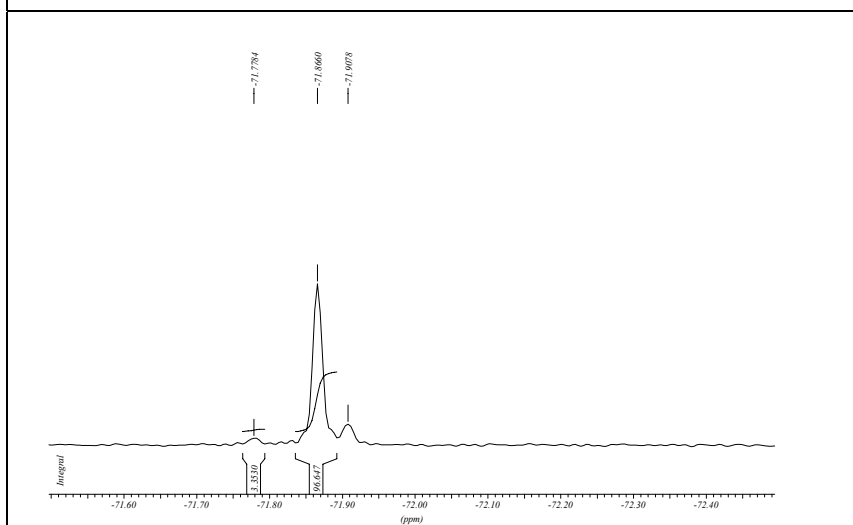

### Non racemic Mosher ester
